# Supplementary material for: TP53 somatic mutations in Asian breast cancer are associated with subtype-specific effects
Source: Springer Nature journal article supplement (doi:10.1186/s13058-023-01635-2), 2023-04-26
Supplement: MOESM1 [file 25285730]

# Supplemental Figures & Table

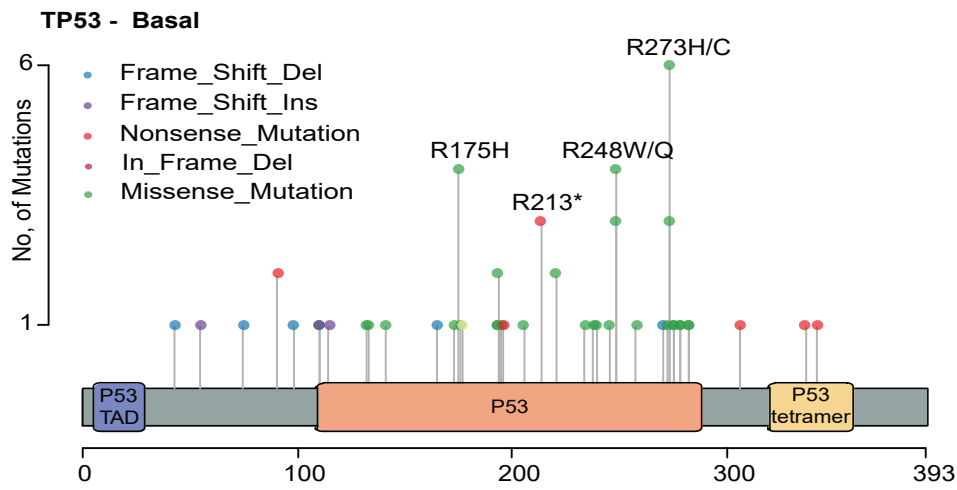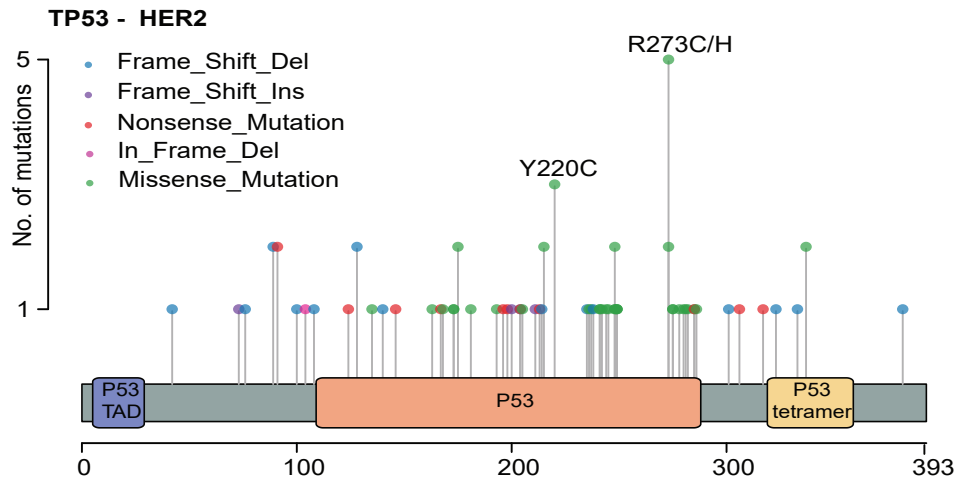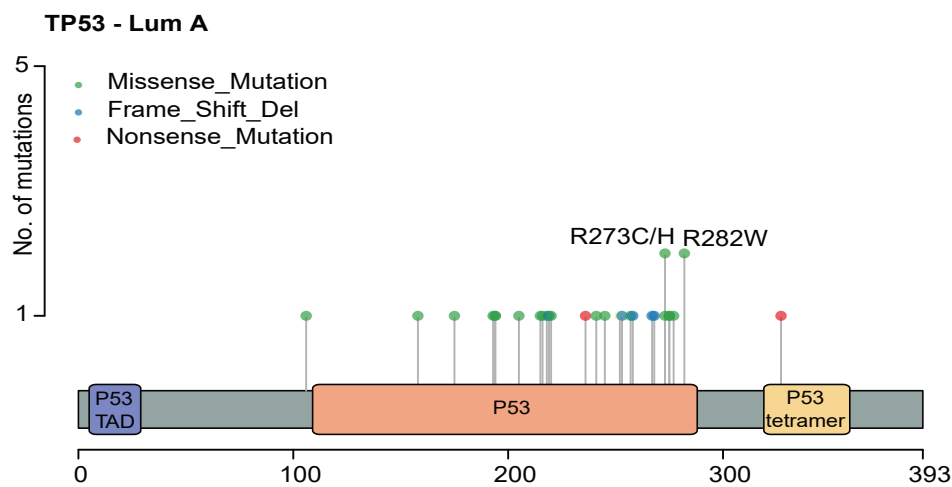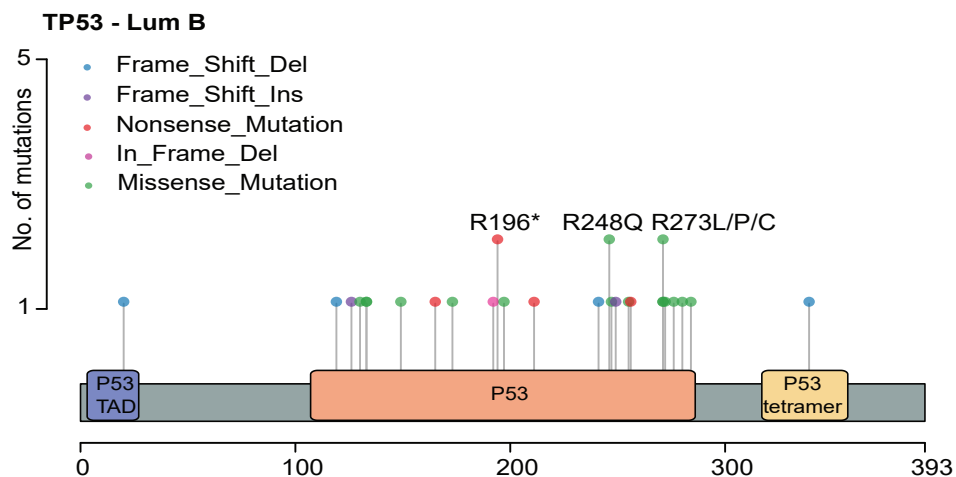

**Supp. Figure 1. Distribution of somatic *TP53* mutations identified in MyBrCa.** The lollipop plots compare the positions of somatic *TP53* mutations across PAM50 subtypes, with prominent positions indicated.

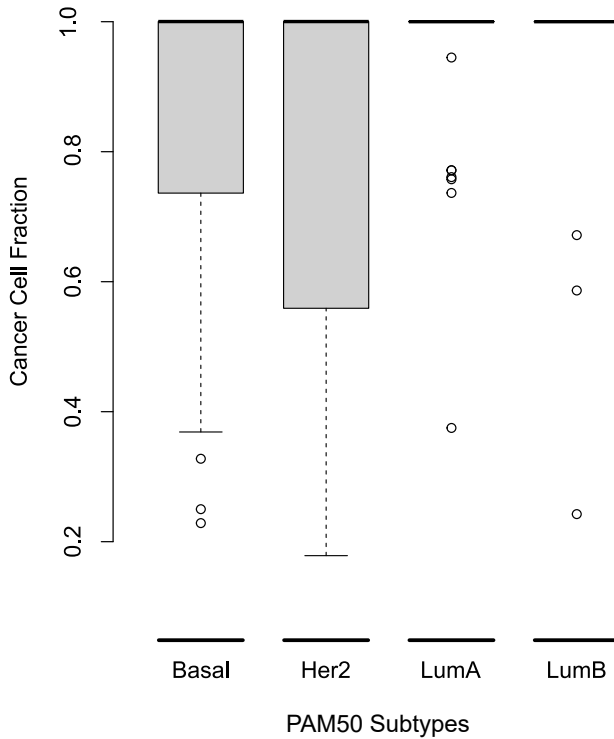

**Supp. Figure 2. Cancer Cell Fraction (CCF) of *TP53* across somatic mutations.** The proportion of cancer cells carrying somatic mutations in *TP53* across PAM50 subtypes in the MyBrCa cohort

| cDNA_Change | Protein_Change | Prevalence (%) |             |             |             | Statistical Significance |
|-------------|----------------|----------------|-------------|-------------|-------------|--------------------------|
|             |                | Basal (n=65)   | Her2 (n=72) | LumA (n=26) | LumB (n=28) |                          |
| c.524G>A    | p.R175H        | 6.20           | 2.80        | 3.85        | 3.57        | 0.797                    |
| c.586C>T    | p.R196*        | 1.50           | 1.39        | 0.00        | 7.69        | 0.230                    |
| c.614A>G    | p.Y205C        | 1.50           | 1.39        | 3.85        | 0.00        | 0.721                    |
| c.637C>T    | p.R213*        | 4.62           | 1.39        | 0.00        | 3.57        | 0.524                    |
| c.659A>G    | p.Y220C        | 3.07           | 4.17        | 3.85        | 0.00        | 0.753                    |
| c.743G>A    | p.R248Q        | 6.15           | 2.78        | 0.00        | 7.14        | 0.435                    |
| c.817C>T    | p.R273C        | 4.62           | 6.95        | 7.69        | 3.57        | 0.857                    |
| c.818G>A    | p.R273H        | 9.23           | 2.78        | 3.85        | 0.00        | 0.173                    |

**Supp. Table 1. Common *TP53* somatic mutations in the MyBrCa cohort.** The table indicates the top ten most common somatic mutations in *TP53* across PAM50 subtypes. The 273C and R175H mutations are common hotspot mutations that can be observed across all subtypes

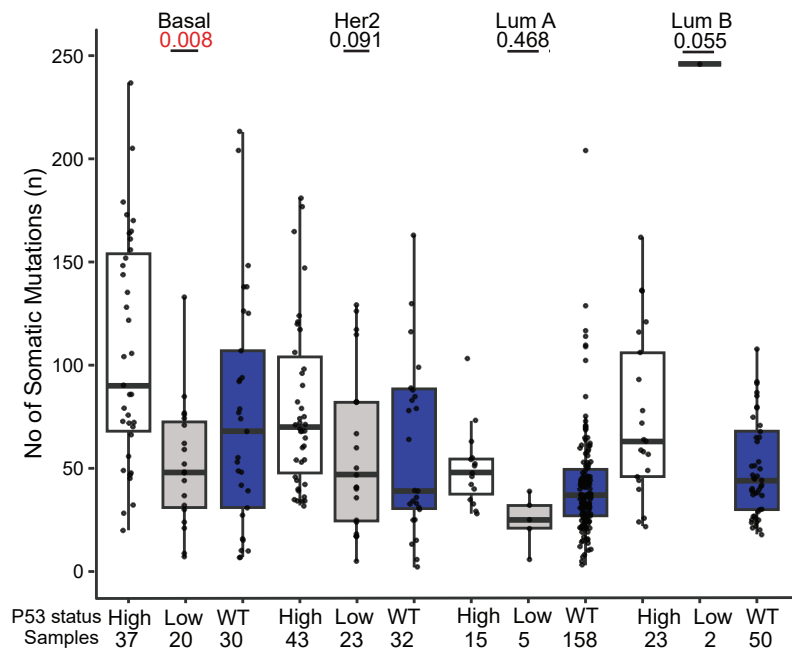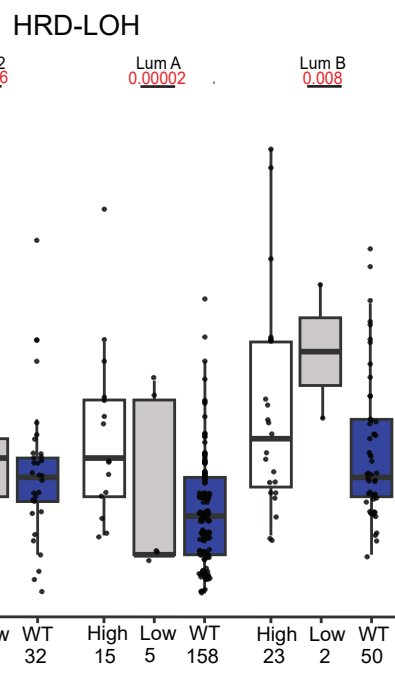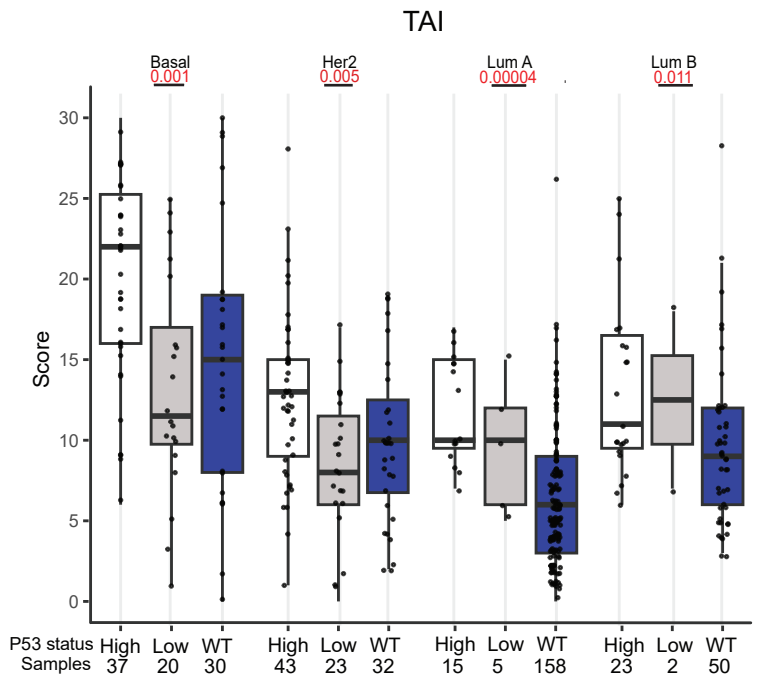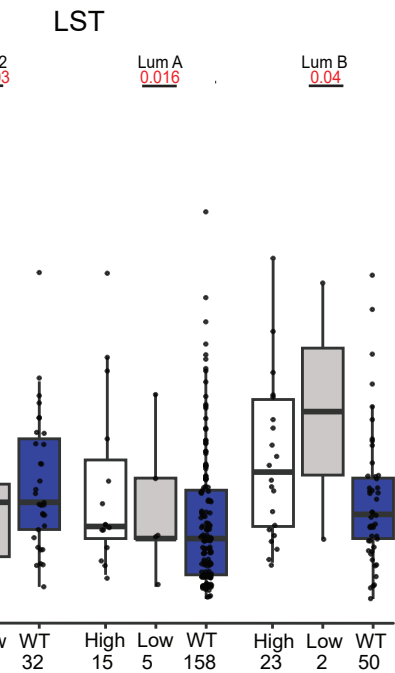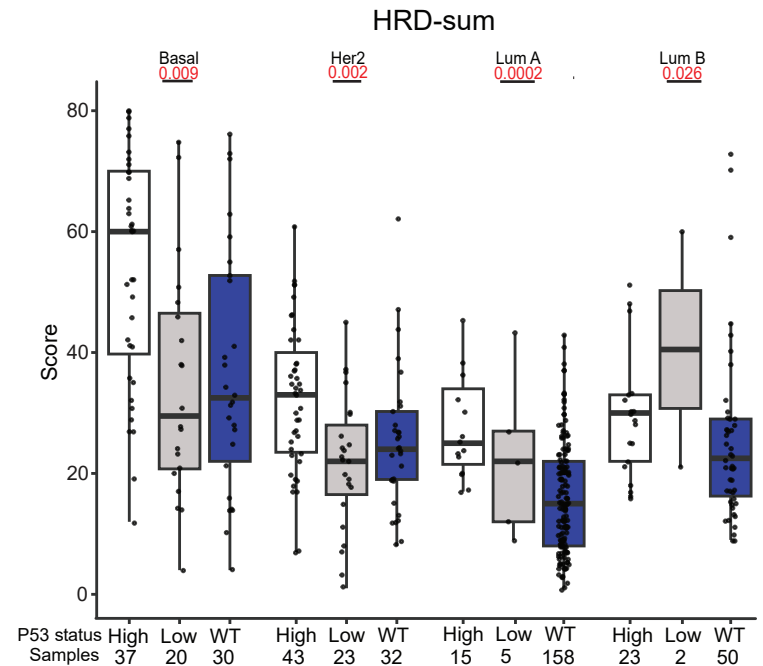

**Supp. Figure 3** : Comparison of TP53 mutations carriers with a high TP53 CCF to samples with low TP53 CCF of Tumour Mutational Burden and HRD scores.
